# Supplementary material for: Environmental Assessment of Furrow vs. Drip Irrigated Pear (Pyrus bretschneideri Rehd.) Production Systems in Loess Plateau (China)
Source: MDPI journal article supplement (doi:10.3390/agronomy11061201), 2021-06-12
Supplement: s1 [file s1]

# **Supplementary materials**

## **Content:**

Section 1 Average weather conditions in the survey area during 2009-2018

Section 2 Lay out of the experimental plot with the furrow and drip irrigated systems

Section 3 Overview of the investigated information

Section 4 Emissions parameters and conversion of equivalent coefficient

# Section 1 Average weather conditions in the survey area during 2009-2018

Table S1 Average weather conditions in the survey area during 2009-2018

| Year | minimum<br>temperature | maximum<br>temperature | mean<br>relative<br>humidity | average<br>wind<br>velocity | sunshine<br>duration | precipitation |
|------|------------------------|------------------------|------------------------------|-----------------------------|----------------------|---------------|
|      | °C                     |                        | %                            | km/day                      | hours                | mm            |
| 2009 | -10.9                  | 29.9                   | 46.5                         | 174.1                       | 6.9                  | 134.7         |
| 2010 | -9.2                   | 31.3                   | 48.9                         | 181.7                       | 7.1                  | 101.9         |
| 2011 | -15.8                  | 29.4                   | 52.8                         | 166.5                       | 7.3                  | 288.0         |
| 2012 | -13.7                  | 29.4                   | 47.0                         | 166.0                       | 7.7                  | 185.3         |
| 2013 | -10.6                  | 29.3                   | 40.1                         | 164.6                       | 7.7                  | 146.7         |
| 2014 | -10.0                  | 29.2                   | 47.8                         | 154.5                       | 7.7                  | 229.1         |
| 2015 | -8.3                   | 29.7                   | 45.0                         | 157.0                       | 7.3                  | 167.2         |
| 2016 | -11.8                  | 29.5                   | 46.2                         | 163.2                       | 7.8                  | 258.1         |
| 2017 | -9.8                   | 30.7                   | 44.6                         | 162.2                       | 7.6                  | 250.9         |
| 2018 | -11.3                  | 29.3                   | 44.7                         | 167.0                       | 7.3                  | 295.1         |

## Section 2 Diagram of the furrow and drip irrigated systems

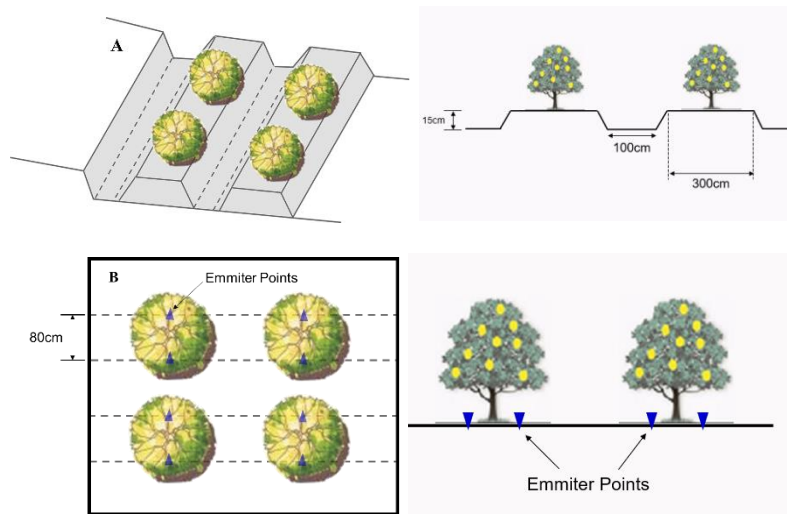

Figure S1 Diagram of the furrow (A) and drip (B) irrigated systems

### Section 3 Overview of the investigated information

Table S2 Overview of the investigated information during 2009-2018

|                               | Year | Yield<br>t ha <sup>-1</sup> | N                   | P <sub>2</sub> O <sub>5</sub> | K <sub>2</sub> O | Pes. | Pap. | Pruning<br>t ha <sup>-1</sup> | Ele.<br>KWh ha <sup>-1</sup> | Die.<br>L ha <sup>-1</sup> | WD<br>m <sup>3</sup> ha <sup>-1</sup> | GWP<br>kg unit ha <sup>-1</sup> | AP     | EP     |
|-------------------------------|------|-----------------------------|---------------------|-------------------------------|------------------|------|------|-------------------------------|------------------------------|----------------------------|---------------------------------------|---------------------------------|--------|--------|
|                               |      |                             | kg ha <sup>-1</sup> |                               |                  |      |      |                               |                              |                            |                                       |                                 |        |        |
| Furrow<br>irrigated<br>system | 2009 | 0                           | 402.9               | 72.3                          | 182.5            | 6.1  | 0    | 0                             | 815.1                        | 125                        | 5682                                  | 4086.8                          | 90.64  | 45.04  |
|                               | 2010 | 6                           | 417.3               | 146.7                         | 182.5            | 6.3  | 100  | 1                             | 975.5                        | 56                         | 6732                                  | 4368.7                          | 90.02  | 46.21  |
|                               | 2011 | 8                           | 417.3               | 146.7                         | 182.5            | 7.3  | 100  | 1.4                           | 997.9                        | 56                         | 7693                                  | 4410.4                          | 90.06  | 47.22  |
|                               | 2012 | 25                          | 527.7               | 201.9                         | 182.5            | 11.5 | 500  | 2.8                           | 1358.6                       | 75                         | 9740                                  | 7133.5                          | 118.73 | 61.70  |
|                               | 2013 | 30                          | 527.7               | 201.9                         | 182.5            | 13.9 | 500  | 3.4                           | 1429.9                       | 75                         | 9468                                  | 7242.2                          | 118.79 | 62.71  |
|                               | 2014 | 72                          | 830.9               | 555.2                         | 258.2            | 18.5 | 900  | 5                             | 1550.8                       | 90                         | 12408                                 | 13900.1                         | 194.53 | 99.47  |
|                               | 2015 | 65                          | 830.9               | 555.2                         | 258.2            | 15.6 | 900  | 3.5                           | 1776.0                       | 86                         | 12189                                 | 13977.4                         | 194.14 | 100.39 |
|                               | 2016 | 78                          | 830.9               | 555.2                         | 258.2            | 17.2 | 900  | 5.5                           | 1643.5                       | 85                         | 12468                                 | 13933.4                         | 194.22 | 101.41 |
|                               | 2017 | 68                          | 830.9               | 555.2                         | 258.2            | 13.9 | 900  | 4                             | 1704.5                       | 97                         | 12466                                 | 13939.6                         | 194.88 | 102.52 |
|                               | 2018 | 79                          | 830.9               | 555.2                         | 258.2            | 18.8 | 900  | 6                             | 1476.2                       | 92                         | 12693                                 | 13871.7                         | 194.74 | 103.51 |
| Drip irrigated<br>system      | 2009 | 0                           | 626                 | 125.1                         | 305.7            | 4.3  | 0    | 0.0                           | 514.8                        | 125.0                      | 3732                                  | 6330.8                          | 64.80  | 42.94  |
|                               | 2010 | 8                           | 198.0               | 102.1                         | 21.1             | 5    | 100  | 0.5                           | 608.5                        | 43                         | 4332                                  | 2928.4                          | 22.50  | 14.41  |
|                               | 2011 | 10                          | 198.0               | 102.1                         | 21.1             | 8    | 100  | 0.7                           | 721.4                        | 52                         | 5613                                  | 3107.4                          | 23.13  | 14.53  |
|                               | 2012 | 35                          | 278.4               | 236.5                         | 71.5             | 10.6 | 500  | 1.6                           | 921.5                        | 50                         | 5765                                  | 4914.6                          | 33.08  | 21.16  |
|                               | 2013 | 40                          | 278.4               | 236.5                         | 71.5             | 13   | 500  | 2.2                           | 880.3                        | 55                         | 5498                                  | 4956.9                          | 33.48  | 21.23  |
|                               | 2014 | 68                          | 362.3               | 307.5                         | 132.0            | 14.6 | 900  | 2.9                           | 1032.5                       | 70                         | 7774                                  | 6789.7                          | 44.85  | 28.16  |
|                               | 2015 | 65.5                        | 362.3               | 307.5                         | 132.0            | 16   | 900  | 2.7                           | 1198.3                       | 55                         | 7480                                  | 6882.0                          | 43.86  | 27.98  |
|                               | 2016 | 72                          | 362.3               | 307.5                         | 132.0            | 18.2 | 900  | 3.3                           | 1125.0                       | 62.5                       | 7845                                  | 6905.7                          | 44.42  | 28.09  |
|                               | 2017 | 62                          | 362.3               | 307.5                         | 132.0            | 12.4 | 900  | 2.5                           | 1115.4                       | 60                         | 7731                                  | 6766.7                          | 44.14  | 28.03  |
|                               | 2018 | 70                          | 362.3               | 307.5                         | 132.0            | 15.3 | 900  | 3.1                           | 1105.8                       | 65                         | 8093                                  | 6842.3                          | 44.54  | 28.11  |

## Section 4 Emissions parameters and conversion of equivalent coefficient

Table S3 Emissions parameters of main agricultural inputs in the pear orchards.

| Item                                                               | Unit                             | GWP                              | AP                               | EP                               | References                    |
|--------------------------------------------------------------------|----------------------------------|----------------------------------|----------------------------------|----------------------------------|-------------------------------|
|                                                                    |                                  | (kg CO <sub>2</sub> eq per unit) | (kg SO <sub>2</sub> eq per unit) | (kg PO <sub>4</sub> eq per unit) |                               |
| N production and transportation                                    | kg N                             | 8.30                             | $2.52 \times 10^{-2}$            | $3.03 \times 10^{-3}$            | Zhang et al., 2013; Yue, 2013 |
| P production and transportation                                    | kg P <sub>2</sub> O <sub>5</sub> | 0.79                             | $6 \times 10^{-4}$               | $8 \times 10^{-5}$               | Zhang et al., 2013; Yue, 2013 |
| K production and transportation                                    | kg K <sub>2</sub> O              | 0.55                             | $4.80 \times 10^{-4}$            | $6 \times 10^{-5}$               | Zhang et al., 2013; Yue, 2013 |
| Pesticides production                                              | kg                               | 19.10                            | $1.05 \times 10^{-2}$            | $1.94 \times 10^{-3}$            | Clark et al., 2016            |
| Diesel                                                             | L                                | 3.75                             | $6.58 \times 10^{-2}$            | $1 \times 10^{-4}$               | Pishgar-Komleh et al., 2013   |
| Electricity                                                        | kWh                              | 0.75                             | $1.45 \times 10^{-2}$            | $8.40 \times 10^{-4}$            | IPCC, 2007; Yue, 2013         |
| Paper bag production                                               | kg                               | 1.77                             | $5.71 \times 10^{-3}$            | $2.31 \times 10^{-3}$            | Ren, 2011                     |
| PVC supplies production                                            | kg                               | 5.90                             | $1.66 \times 10^{-2}$            | $4.60 \times 10^{-4}$            | Shi et al., 2019              |
| Transportation of pesticides, PVC and wastepaper bags <sup>§</sup> | t km                             | 0.36                             | $2.07 \times 10^{-3}$            | $6.34 \times 10^{-4}$            | Ecoinvent v3, 2016            |
| Transportation of waste pruning <sup>§</sup>                       | t km                             | 0.72                             | $3.41 \times 10^{-3}$            | $8.60 \times 10^{-4}$            | Ecoinvent v3, 2016            |

<sup>§</sup> Emission factors represented the transportation of agricultural materials and waste pruning by two kinds of agricultural tractors, expressed as t\*km, which were extrapolated from Ecoinvent v3 database in SimaPro 5.2 (2016).

Table S4 The reactive nitrogen losses emission parameters of the furrow and drip irrigated pear production systems at the orchard management stage.

| Irrigation pattern | Emission item             | Emission parameters                                         | References                                |
|--------------------|---------------------------|-------------------------------------------------------------|-------------------------------------------|
| Furrow             | NH <sub>3</sub>           | 8.74% of N fertilizer input                                 | Ge et al., 2010; Zhu et al., 2018         |
|                    | Nitrate leaching          | 17.21% of N fertilizer input                                | Chen et al., 2014; Fan et al., 2013       |
|                    | N <sub>2</sub> O          |                                                             |                                           |
|                    | Direct N <sub>2</sub> O   | 0.78% of N fertilizer input                                 | Pang et al., 2019                         |
|                    | Indirect N <sub>2</sub> O | 1%NH <sub>3</sub> emission + 2.50% NO <sub>3</sub> emission | Perrin et al., 2014; Nemecek et al., 2008 |
|                    | NO <sub>x</sub>           | 10% of the N <sub>2</sub> O emission                        | Perrin et al., 2014                       |
| Drip               | NH <sub>3</sub>           | 3.15% of N fertilizer input                                 | Zhou et al., 2015                         |
|                    | Nitrate leaching          | 12.50% of N fertilizer input                                | Lv et al., 2019                           |
|                    | N <sub>2</sub> O          |                                                             |                                           |
|                    | Direct N <sub>2</sub> O   | 0.15% of N fertilizer input                                 | Abalos et al., 2019                       |
|                    | Indirect N <sub>2</sub> O | 1%NH <sub>3</sub> emission + 2.50% NO <sub>3</sub> emission | Perrin et al., 2014; Nemecek et al., 2008 |
|                    | NO <sub>x</sub>           | 10% of the N <sub>2</sub> O emission                        | Perrin et al., 2014                       |

Table S5. The equivalent coefficient of the emissions inventory for environmental impact potentials.

| Emissions inventory          | Global warming              | Acidification               | Aquatic eutrophication      |
|------------------------------|-----------------------------|-----------------------------|-----------------------------|
|                              | CO <sub>2</sub> -equivalent | SO <sub>x</sub> -equivalent | PO <sub>4</sub> -equivalent |
| CO <sub>2</sub>              | 1                           |                             |                             |
| CO                           | 2                           |                             |                             |
| CH <sub>4</sub>              | 28                          |                             |                             |
| N <sub>2</sub> O             | 298                         |                             | 0.13                        |
| NO <sub>x</sub>              | 298                         | 0.7                         | 0.13                        |
| NH <sub>3</sub>              |                             | 1.88                        | 0.33                        |
| SO <sub>x</sub>              |                             | 1                           |                             |
| NO <sub>3</sub> <sup>-</sup> |                             |                             | 0.42                        |
| NH <sub>3</sub>              |                             |                             | 0.33                        |
| P <sub>tot</sub>             |                             |                             | 3.06                        |

Huijbregts et al., 2000; Deng and Wang, 2003; IPCC, 2013.

Additional reference:

- Chen, L., Hao, M., Li, Z., 2014. Effects of long-term application of fertilizers on nitrate accumulation in the Loess Plateau dryland. *Res. Soil Water Conserv.* 21, 43-46 (in Chinese).
- Clark, S., Khoshnevisan, B., Seefedpari, P., 2016. Energy efficiency and greenhouse gas emissions during transition to organic and reduced-input practices: Student farm case study. *Ecol. Eng.* 88, 186-194.
- Ecoinvent v3 database, 2016. The Swiss centre for life cycle inventories. Ecoinvent v3.
- Fan, P., Li, J., Zhang, L., Cao, Y., Kasimu, J., 2013. Soil nitrogen contents and deep profile distributions in apple orchards of the Loess Plateau. *Plant Nutr. Fert. Sci.* 19, 420-429 (in Chinese).
- Ge, S.F., Jiang, Y.M., Peng, F.T., Fang, X.J., Wang, H.N., Dong, M.X., Liu, J.C., 2010. Effect of chemical fertilizers application combined with organic manure on ammonia volatilization in spring in apple orchard. *J. Soil Water Conserv.* 24, 199-203 (in Chinese).
- IPCC, 2007. *Climate Change 2007: The physical science basis*. Cambridge University Press, Cambridge, UK.
- Nemecek, T., von Richthofen, J.S., Dubois, G., Casta, P., Charles, R., Pahl, H., 2008. Environmental impacts of introducing grain legumes into European crop rotations. *Eur. J. Agron.* 28, 380-393.
- Perrin, A., Basset-Mens, C., Gabrielle, B., 2014. Life cycle assessment of vegetable products: a review focusing on cropping systems diversity and the estimation of field emissions. *Int. J. Life Cycle Assess.* 19, 1247-1263.
- Pishgar-Komleh, S.H., Omid, M., Heidari, M.D., 2013. On the study of energy use and GHG (greenhouse gas) emissions in greenhouse cucumber production in Yazd province. *Energ.* 59, 63-71.
- Ren, L.J., 2011. *Methodology research and typical paper products of life cycle assessment*. Beijing University of Technology Press, Beijing, pp. 56-59 (in Chinese).
- SimaPro 5.2, 2016. *LCA Software and Database Manual*. Pré Consultants BV, Amersfoort, The Netherlands.
- Yue, S.C., 2013. *Optimum Nitrogen Management for High-Yielding Wheat and Maize Cropping System*. China Agricultural University Press, Beijing, pp. 80 (In Chinese with English abstract).
- Zhang, W.F., Dou, Z.X., He, P., Ju, X.T., Powelson, D., Chadwick, D., Norse, D., Lu, Y.L., Zhang, Y., Wu, L., Chen, X.P., Cassman, K.G., Zhang, F.S., 2013. New technologies reduce greenhouse gas emissions from nitrogenous fertilizer in China. *P. of the Natl. Acad. Sci. USA.* 110, 8375-8380.
- Zhang, Y., Lei, H., Zhao, W., Shen, Y., Xiao, D., 2018. Comparison of the water budget for the typical cropland and pear orchard ecosystems in the north China plain. *Agr. Water Manage.* 198, 53-64.
- Zhang, Y., Shen, Y., Xu, X., Sun, H., Li, F., Wang, Q., 2013. Characteristics of the water-energy-carbon fluxes of irrigated pear (*Pyrus bretschneideri* rehd) orchards in the north china plain. *Agr. Water Manage.* 128, 140-148.
- Zhou, G. W., Zhang, W., Min, W., MA, L. J., Hou, Z. A. 2015. Effects of the salinity of irrigation water on soil ammonia volatilization in drip-irrigated cotton fields. *Journal of Plant Nutrition and Fertilizer*, 21(2), 413-420 (in Chinese with English abstract).
